# Supplementary material for: Assessing the effects of stress on feeding behaviors in laboratory mice
Source: eLife. 2022 Feb 15;11:e70271. doi: 10.7554/eLife.70271 (PMC8846584; doi:10.7554/eLife.70271)
Supplement: Figure 1—source data 1. [file elife-70271-fig1-data1.xlsx]

## Sheet: Figure 1 - Source Data 1
Figure 1 - Source Data 1
Males
	BW		Latency (min)		Food 30min (Kcal)
	H	N	H	N	H	N
1	24.7	24.3	1.51667	5.76667	1.515	1.515
2	23.8	23.2	0.6	1.51667	1.818	1.212
3	26.8	26.3	0.633333	3.51667	1.818	0.909
4	23	22.7	0.85	2.56667	1.818	1.818
5	26.7	26.7	0.383333	7.06667	1.515	0.909
6	23.9	22.7	0.583333	1.61667	2.424	1.818
7	24.6	23.8	0.833333	2.93333	1.818	1.515
8	23.3	23	0.85	2.56667	1.818	0.909
9	25	26.3	1.03333	10.25	1.212	0.606
10	28.3	28.2	0.833333	5.31667	1.818	1.515
Females
	BW		Latency (min)		Food 30min (Kcal)		Estrous cycle phase
	H	N	H	N	H	N	H	N
11	24.4	22.1	1.15	7.65	1.515	1.212	P	P
12	23	21.2	7.66667	6	1.515	0.909	P	P
13	21.2	21.2	0.866667	31.6	1.515	0.303	E	P
14	21	18.4	3.8	6.2	1.212	1.212	P	E
15	24	22.9	4.13333	10.4167	1.212	0.303	P	P
16	21.1	20.8	5.71667	44.5333	0.606	0.303	D	E
17	20.9	18.5	16.3	15.2333	0.606	0.606	D	P
18	21.1	20.3	23.35	40.0167	0.1515	0.606	D	D
19	20.1	19.7	24.6	22.25	0.1515	0.606	D	D
20	21.1	20.5	16.2667	70.7167	0.1515	0.303	D	P
21	20.1	19.6	0.833333	21.9833	1.818	0.4545	P	D
22	19	19	0.9	18.7333	1.818	0.4545	P	D
23	17.2	16.8	1.78333	22.5	0.909	1.212	E	E
24	19	18.8	4.56667	12.5667	1.515	0.909	E	E
25	16	17.3	13.9167	65.45	0.303	0.909	D	E
26	17.1	17.4	10.75	24.45	1.515	0.606	E	E
27	19.1	18.7	6.31667	58.7167	0.909	0.606	P	D
