# Supplementary material for: Assessing the effects of stress on feeding behaviors in laboratory mice
Source: eLife. 2022 Feb 15;11:e70271. doi: 10.7554/eLife.70271 (PMC8846584; doi:10.7554/eLife.70271)
Supplement: Figure 1—source data 2. [file elife-70271-fig1-data2.xlsx]

## Sheet: Figure 1 - Source Data 2
Figure 1 - Source Data 2
Time of day	Test	EC	Estrogen (pg/ml)	LH (ng/ml)	FSH (ng/ml)
Dark	H	P	2.5	1.27	13.64
Dark	H	P	3.861	1.02	11.24
Dark	N	D	3.927	0.24	11.24
Dark	N	D	3.532	0.87	7.37
Dark	N	E	6.543	0.24	13.22
Dark	H	P	4.236	0.24	8.17
Dark	N	P	7.391	0.24	14.31
Dark	H	P	5.3	0.24	21.03
Dark	N	E	4.926	0.24	15.65
Dark	H	P	6.332	0.24	42.37
Dark	H	D	4.052	0.255	8.87
Dark	N	E	5.445	0.24	5.86
Dark	H	P	7.976	0.24	14.18
Dark	H	E	7.285	0.24	9.67
Dark	H	P	6.056	0.24	21.22
Dark	N	P	5.3	0.24	11.78
Dark	N	E	7.147	0.24	11.08
Dark	N	D	4.755	0.24	19.37
Dark	N	D	5.281	0.24	11.37
Dark	N	P	8.3	5.41	31.84
Dark	N	P	5.918	0.24	14.57
Dark	H	P	4.019	0.55	13.06
Dark	H	P	3.224	0.24	17.96
Dark	H	E	4.584	0.24	9.57
Dark	H	D	5.3	0.24	8.81
Dark	N	E	2.96	0.45	9.47
Dark	N	P	13.82	0.24	19.17
Dark	N	E	5.3	0.91	7.99
Dark	N	E	2.5	0.24	6.73
Dark	N	P	2.5	0.24	11.81
Dark	N	P	2.5	0.24	23.59
Dark	H	P	2.5	0.24	7.27
Dark	H	E	2.5	0.6	10.92
Dark	H	D	5.156	0.24	19.91
Dark	H	D	5.4	1.04	7.57
Dark	N	D	5.172	0.57	7.13
Dark	N	P	4.784	0.24	4.9
Dark	N	P	3.567	0.24	26.18
Dark	H	E	4.895	0.24	9.7
Light	H	P	6.069	14.19	27.65
Light	H	E	6.742	1.42	6.03
Light	H	E	3.81	0.65	8.42
Light	H	E	4.774	0	5.95
Light	H	P	5.69	22.19	38.3
Light	H	P	3.223	7.96	15.28
Light	N	P	5.71	7.15	25.77
Light	N	P	3.407	0.6	34.02
Light	H	E	3.717	1.28	10.86
Light	N	P	4.411	0.53	30.26
