# Supplementary material for: Assessing the effects of stress on feeding behaviors in laboratory mice
Source: eLife. 2022 Feb 15;11:e70271. doi: 10.7554/eLife.70271 (PMC8846584; doi:10.7554/eLife.70271)
Supplement: Figure 2—source data 1. [file elife-70271-fig2-data1.xlsx]

## Sheet: Figure 2 - Source Data 1
Figure 2 - Source Data 1
Outliers
	BW		Latency (min)		Food 30min (Kcal)		Estrous cycle phase
	H	N	H	N	H	N	H	N
	16	17.8	13.1	21.5833	1.7574	0.909	D	D
28	16.7	17.6	0.95	4.7	1.5756	1.0908	E	E
29	15.6	16.3	1.8	2.16667	0.6969	1.212	D	E
30	19.5	18.6	0.883333	5.71667	0.3939	1.2423	D	D
	18.1	18.3	4.56667	20.0167	1.4241	0.606	D	E
31	17.7	17.6	0.6	5.38333	1.1211	0.5757	D	D
32	16.6	16.5	1.93333	6.28333	0.9696	0.8484	D	D
33	15.4	15.1	2	4.3	0.7878	1.0302	E	D
34	16.4	16.4	0.05	3.65	1.0605	0.9393	E	D
35	17.3	17.3	0.95	3.18333	1.6362	1.0302	D	E
36	17.5	17.5	0.0333333	3.21667	1.3332	1.1817	P	P
37	14.5	14.5	3.5	3.11667	0.6666	1.0908	D	D
38	17.3	17.3	1.33333	5.98333	0.8181	1.0302	E	P
39	17.2	17.2	3.6	3.03333	1.4847	0.6666	E	E
40	15.1	15.1	0.65	5.78333	1.0605	0.9999	D	D
41	17.1	17.1	2	1.9	1.6059	1.4544	P	D
42	16.4	17	5.66667	0.8	0.6969	1.1817	E	D
	17.4	18	11.3167	7.81667	1.7271	0.6666	E	D
43	17.4	18.4	0.65	3.95	1.5756	0.8181	D	E
44	18.5	19.7	3.73333	1.33333	1.0302	0.5454	D	E
45	16.8	17.3	3.55	3.01667	1.6665	1.0605	D	E
46	17.3	17.7	0.0833333	5.35	1.9089	0.9393	E	E
47	16.9	17.2	0.3	2.23333	1.6059	1.0605	P	E
48	16.7	16.5	1.68333	7.18333	1.2423	0.8181	D	D
