# Supplementary material for: Assessing the effects of stress on feeding behaviors in laboratory mice
Source: eLife. 2022 Feb 15;11:e70271. doi: 10.7554/eLife.70271 (PMC8846584; doi:10.7554/eLife.70271)
Supplement: Figure 3—source data 1. [file elife-70271-fig3-data1.xlsx]

## Sheet: Figure 3 - Source Data 1
Figure 3 - Source Data 1
Outliers
Males	BW		Latency (min)		Food 30min (Kcal)
	H	N	H	N	H	N
49	21.4	20.6	6.03333	9.08333	1.515	1.212
	21.7	21.2	2.78333	8.26667	1.212	4.848
50	21.9	21.9	1.15	1.6	1.515	1.212
51	23.7	24.1	1.55	16.7333	2.424	1.212
52	24.4	23.8	0.816667	1.8	1.818	1.515
53	21.9	21	2.43333	4.26667	1.212	1.212
54	22	21.8	0.55	3.5	1.818	1.212
55	23.1	22.9	3.33333	24.2833	0.909	0.606
56	23.5	21.9	0.8	2.16667	0.606	0.909
57	21.6	21.2	3.71667	6.66667	1.212	0.909
58	23.7	23.7	1	8.9	1.212	0.909
	24.4	23.5	3.01667	47.1333	0.303	0.303
59	23	22.1	1	8.93333	0.909	1.212
	24.3	22.3	12.5833	14.6333	0.303	0.303
Females	BW		Latency (min)		Food 30min (Kcal)		Estrous cycle phase
	H	N	H	N	H	N	H	N
	18.5	19.9	1.9	24.1333	1.9695	0.303	E	D
60	21.4	21.6	1.98333	10.3333	1.212	0.909	D	D
	18.1	18.6	12.6333	9.71667	1.212	0.909	D	E
61	19.4	20	2.18333	11.5167	1.212	0.4545	E	D
62	18.5	18.9	1.6	6.05	1.515	0.909	E	E
63	17.9	18.2	1.3	5.73333	1.212	0.909	D	D
64	19.5	19.6	2.6	8.21667	1.212	0.909	D	D
65	19.6	20.2	2.05	6.86667	0.909	0.303	D	E
66	-	21.5	1.85	9.45	2.121	1.212	E	E
67	18.6	18.9	7	9.5	1.515	0.606	D	E
