# Supplementary material for: Assessing the effects of stress on feeding behaviors in laboratory mice
Source: eLife. 2022 Feb 15;11:e70271. doi: 10.7554/eLife.70271 (PMC8846584; doi:10.7554/eLife.70271)
Supplement: Figure 3—source data 2. [file elife-70271-fig3-data2.xlsx]

## Sheet: Figure 3 - Source Data 2
Figure 3 - Source Data 2
Outliers
Adults	BW		Latency (min)		Food 30min (Kcal)
	H	N	H	N	H	N
142	19.8	20	12.6667	12.65	0.606	0.909
143	20.4	21.2	4.63333	8.11667	0.909	0.909
144	20	19.7	3.2	38.8333	1.818	0.303
145	20.5	19.3	0.2	14.2167	2.727	1.212
146	21.1	21.1	7.71667	33.7167	0.909	0.1515
147	19.1	18.5	4.3	42.3	0.606	0.909
148	21	20.3	1.61667	12.25	1.212	1.515
149	21.7	20	3.98333	9.86667	2.121	0.909
150	20	19.8	2.35	33.5667	1.515	0
Adolescents	BW		Latency (min)		Food 30min (Kcal)
	H	N	H	N	H	N
151	17.5	17.2	0.666667	5.25	1.212	1.818
152	16.6	16.6	0.5	2.36667	1.212	1.212
153	16.4	14.7	1.25	0.983333	0.909	1.6665
154	16	16	3.21667	3.03333	1.515	1.212
155	15.9	16.2	0.633333	5.65	0.909	0.909
156	17.1	17.5	1.98333	4.46667	0.909	0.909
	14.9	15.9	6.58333	16.4333	0.909	0.606
157	14.35	13.8	3.05	10.9333	0.909	1.515
158	14.8	14.2	0.5	2.58333	1.212	1.515
159	16.7	15.9	0.95	12.9333	0.909	0.909
160	14.8	13.3	2.53333	5.9	0.303	1.515
161	14.3	14.2	0.966667	7.48333	1.515	0.909
162	14.5	13.56	1.8	4.46667	1.515	1.515
	16.2	14.94	2.95	53.8833	0.606	1.212
163	16.8	16.7	0.733333	4.63333	1.818	1.515
