# Supplementary material for: Assessing the effects of stress on feeding behaviors in laboratory mice
Source: eLife. 2022 Feb 15;11:e70271. doi: 10.7554/eLife.70271 (PMC8846584; doi:10.7554/eLife.70271)
Supplement: Figure 4—source data 2. [file elife-70271-fig4-data2.xlsx]

## Sheet: Figure 4 - Source Data 2
Figure 4 - Source Data 2
	BW		Latency (min)		Food 30min (Kcal)
	H	N	HT	NT	HT	NT
164	16.6	16.7	1.03333	1.55	0.606	0.7575
165	16.7	17.2	0.65	0.183333	1.4544	1.6059
166	17.4	17.8	0.466667	4.28333	1.1514	0.5454
167	15.5	16	1.03333	3.76667	1.515	0.7272
168	16.5	16.5	0.3	0.0833333	1.7877	1.2726
169	16.2	16.2	0.283333	5.93333	1.1514	0.4848
170	18.1	18.1	0.283333	4.28333	1.3635	0.9696
171	18	18	1.56667	3.75	1.0908	1.3029
