# Supplementary material for: Assessing the effects of stress on feeding behaviors in laboratory mice
Source: eLife. 2022 Feb 15;11:e70271. doi: 10.7554/eLife.70271 (PMC8846584; doi:10.7554/eLife.70271)
Supplement: Figure 5—source data 1. [file elife-70271-fig5-data1.xlsx]

## Sheet: Figure 5 - Source Data 1
Figure 5 - Source Data 1
Outliers
Males	Starting		BW		Latency (min)		Food 30min (Kcal)
	BW	Glucose	H	N	H	N	H	N
115	24.1	166	35.6	35.5	0.4	8.23333	0.6252	0.8336	166
116	23	140	28.8	28.3	0.8	2.08333	0.4689	1.3025	140
	24.1	-	32	31.9	0.633333	-	0.1042	-	-
117	23.6	126	36.4	36.5	0.866667	3.5	0.0521	4.2722	126
	23	-	33.3	32.9	2.36667	21.3167	0.521	0.9378	-
118	23.5	102	30	29.3	1.03333	9.46667	0.1563	0.6252	102
119	23	106	33	32.6	0.716667	19.2833	0.2605	1.7193	106
120	22.8	114	29.7	29.4	0.983333	1.31667	0.8857	3.5949	114
121	24.5	131	31.4	31.5	0.9	25.85	0.3647	0.521	131
122	23	107	31.8	32.7	0.416667	15.45	0.2605	0.4689	107
123	23.1	116	29	29.9	1.31667	29.6833	0.2084	1.0941	116
124	23	102	34	34.4	0.7	11.05	0.3126	0.4168	102
125	23.2	147	38.6	32.1	0.216667	27.8667	0.3647	0.3126	147
126	24.1	120	32	38.8	1.3	18.3667	0.2084	0.8336	120
127	23.4		29.3	29.4	0.35	6.1	0.2605	0.7815
Females	Starting		BW		Latency (min)		Food 30min (Kcal)		Estrous cycle phase
	BW	Glucose	H	N	H	N	H	N	H	N
128	19	81	21.9	21.9	0.516667	0.166667	1.042	0.6252	E	D
129	20.4	87	26.8	27.5	1.15	0.183333	0.4168	0.521	E	D
130	18	90	22	22.1	1.41667	19.05	0.4168	1.5109	D	P
131	16.8	109	22.4	22.15	0.733333	0.2	0.5731	3.8554	D	D
132	20.3	103	26	26.5	2.78333	0.233333	0.1563	0.5731	E	D
133	18.6	91	26	26.1	1.15	19.6	0.5731	1.2504	D	P
134	18.7	111	22.5	22.3	0.816667	2.28333	0.3647	0.8336	P	D
135	20.7	130	25.6	25.7	1.33333	0.816667	0.2605	4.0117	P	D
136	20	115	26	26	14.1667	2.03333	0.521	0.7294	P	E
137	19.7	95	25.2	25.2	0.45	32.8833	0.2084	0.9899	D	P
138	20.4	90	29.4	29	6.9	0.45	0.4168	1.8756	P	E
139	20.4	111	25.3	25.3	6.9	2.63333	0.4168	0.2084	E	D
140	18.5	102	21.3	21.3	12.25	18.55	0.1042	0.9899	E	P
141	16.6	87	23.8	23.8	14.75	4.96667	0.3647	0.7815	P	E
	18.5		22.5	22.5	44.7333	21.7167	0.5731	0.1563	E	P
