# Supplementary material for: Assessing the effects of stress on feeding behaviors in laboratory mice
Source: eLife. 2022 Feb 15;11:e70271. doi: 10.7554/eLife.70271 (PMC8846584; doi:10.7554/eLife.70271)
Supplement: Figure 5—source data 2. [file elife-70271-fig5-data2.xlsx]

## Sheet: Figure 5 - Source Data 2
Figure 5 - Source Data 2
Outliers
Males	Starting	BW		Latency (min)		Food 30min (Kcal)
	BW	HT	NT	HT	NT	HT	NT
172	25.2	25.5	26.1	0.366667	1.78333	5.8873	2.3966
173	24.5	24	24.4	0.2	2.68333	6.9814	3.0218
174	27.3	26.9	27.1	0.15	2.06667	4.9495	2.3966
175	25	24.8	25.2	0.466667	2.38333	4.4806	2.9176
176	24	24.6	24.6	0.15	0.8	4.3764	2.5529
177	28	28	28.1	0.116667	1.66667	4.4285	3.3344
178	22.5	24.8	24.4	1.36667	0.816667	3.8554	5.0537
179	26	26.8	26.8	1.63333	1.58333	5.1579	4.3764
180	26.6	27	27.2	0.266667	0.233333	5.0016	1.6151
181	27	27.3	27.4	0.683333	0.633333	3.9596	3.6991
	29	29.3	29	0.516667	5.08333	5.9394	2.3966
182	28.7	28.4	28	0.183333	2.21667	5.21	2.0319
Females	Starting	BW		Latency (min)		Food 30min (Kcal)		Estrous cycle phase
	BW	HT	NT	HT	NT	HT	NT	EC HT	EC NT
183	20.7	21.5	20.9	0.233333	0.366667	5.0537	3.8033	D	p
184	21.1	21.9	21.2	0.35	0.483333	4.8974	4.2201	D	P
185	22.5	23.2	22.5	0.183333	0.35	5.4184	5.3663	P	P
186	21.95	22	21.5	0.133333	0.166667	5.6789	4.7411	E	E
187	21.5	22.1	22.3	0.2	0.216667	6.4083	5.1058	D	E
188	20.9	22.4	22.2	0.216667	0.0833333	7.294	4.8453	D	D
189	23.65	22.3	22.6	0.25	0.0666667	5.3663	6.3562	E	D
190	20	20	20.2	0.516667	0.266667	6.3041	7.815	D	D
191	20.5	20.5	21	0.266667	0.133333	5.8352	4.2201	D	D
192	21.1	22	21.5	0.316667	0.283333	8.0234	9.7948	P	P
193	20.95	21.9	20.7	0.2	0.216667	3.4907	1.6672	E	E
194	22.25	20.9	20.6	0.0833333	0.183333	4.689	3.3344	E	E
195	23.85	23.8	23.8	0.35	0.383333	5.6789	4.5848	P	P
196	21.45	22.4	21.7	0.283333	0.766667	7.8671	5.9915	P	P
197	22.4	22.3	21.6	0.216667	0.266667	4.4806	10.2637	P	D
