# Supplementary material for: Assessing the effects of stress on feeding behaviors in laboratory mice
Source: eLife. 2022 Feb 15;11:e70271. doi: 10.7554/eLife.70271 (PMC8846584; doi:10.7554/eLife.70271)
Supplement: Supplementary file 1. — (A) Summary of experimental groups. Overview of the number of cohorts and animals included in the analysis of each experimental type, as well as the number of animals excluded because they failed to train or were outliers. (B) Test type. Strength of association between two main outcomes, latency (i) and food intake (ii), and type of the assay (manual vs. automated) in the morning assay in females on chow, socially isolated in adulthood. Strength of association between the two outcomes, latency (iii) and food intake (iv), by test type (novel vs. home), and type of the assay, in the morning assay in females on chow, socially isolated in adulthood. The models were adjusted for body weight, age, and test order (home or novel test performed first). (C) Social isolation length. Strength of association between two main outcomes, latency (i) and food intake (ii), and length of social isolation (2 vs. 6–7 weeks) in both morning and dark phase assays in females on chow. Strength of association between the two outcomes, latency (iii) and food intake (iv), by test type (novel vs. home), and length of social isolation, in both morning and dark phase assays in females on chow. Strength of association between two main outcomes, latency (v) and food intake (vi), and length of social isolation (2 vs. 6–7 weeks) in the morning msuppleemanual assay in males on chow. Strength of association between the two outcomes, latency (vii) and food intake (viii), by test type (novel vs. home), and length of social isolation, in the morning manual assay in males on chow. Strength of association between two main outcomes, latency (ix) and food intake (x), sex, and length of social isolation (2 vs. 6–7 weeks) in the morning manual assay in adult males and females on chow socially isolated at 5 weeks for 7 weeks or during adulthood for 2 weeks. Strength of association between the two outcomes, latency (xi) and food intake (xii), by test type (novel vs. home), sex, and length of social isolation, in [file elife-70271-supp1.xlsx]

## Sheet: 1A. Experimental Summary
		Manual measurements				Automated measurements
		Light phase					Dark phase
		Chow								Chronic HFD		Acute HFD
		Males		Females					Males		Females		Males
		Adu. SI	Ado. SI	Adu. SI	Ado. SI	Adu. SI		Ado. SI	Adu. SI
	Cohorts	2	3	3	2	3	4	2	2	1	1	1	1
	Untrained	2	1	2	0	2	0	1	0	1	1	0	0
	Outlier	0	3	0	2	3	1	1	1	2	1	1	0
	Included	10	11	17	8	21	16	16	15	13	14	11	15

## Sheet: 1B. Test type
	Test type	Test Home vs. Novel		B	Std. Error	95% Wald Confidence Interval		Hypothesis Test
						Lower	Upper	Wald Chi-Square	df	Sig.
	i. Dependent Variable: Latency	0 Home	(Intercept)	-270.628	490.528	-1232.04	690.79	0.30438	1	0.581149
			Body weight	59.4976	35.9851	-11.0319	130.027	2.73372	1	0.0982503
			Age	-57.1303	17.254	-90.9475	-23.3131	10.9636	1	0.000929182
			Test order	10.5952	53.1935	-93.6621	114.853	0.0396738	1	0.84212
			Manual vs. Automated assay	523.962	152.484	225.099	822.825	11.8073	1	0.000589983
			(Scale)	80256.4
		1 Novel	(Intercept)	63.4831	1452.47	-2783.31	2910.28	0.00191029	1	0.965138
			Body weight	93.0228	90.706	-84.7578	270.803	1.05174	1	0.305108
			Age	-131.903	41.3505	-212.948	-50.8571	10.1752	1	0.00142339
			Test order	116.033	109.535	-98.6527	330.718	1.12215	1	0.289455
			Manual vs. Automated assay	2015.22	427.326	1177.68	2852.77	22.2397	1	2.40646e-06
			(Scale)	540303
	ii. Dependent Variable: Food intake	0 Home	(Intercept)	1.14999	0.877845	-0.570553	2.87053	1.71614	1	0.19019
			Body weight	-0.0407965	0.0611864	-0.16072	0.0791267	0.444566	1	0.504927
			Age	0.0594802	0.023631	0.0131643	0.105796	6.33551	1	0.0118344
			Test order	0.054696	0.202597	-0.342387	0.451779	0.0728861	1	0.78718
			Manual vs. Automated assay	-0.293416	0.270259	-0.823114	0.236281	1.17871	1	0.277618
			(Scale)	0.272952
		1 Novel	(Intercept)	2.41157	0.539998	1.35319	3.46994	19.9441	1	7.97385e-06
			Body weight	-0.0962634	0.032079	-0.159137	-0.0333898	9.00496	1	0.00269248
			Age	0.0223026	0.0139442	-0.0050275	0.0496328	2.55814	1	0.109727
			Test order	-0.0634078	0.10785	-0.274791	0.147975	0.345655	1	0.556583
			Manual vs. Automated assay	-0.221408	0.106257	-0.429668	-0.0131492	4.34186	1	0.0371863
			(Scale)	0.0666007
	iii. Dependent Variable: Latency		(Intercept)	350.661	933.562	-1479.09	2180.41	0.141088	1	0.707202
			Body weight	88.7918	51.8313	-12.7957	190.379	2.93469	1	0.0866955
			Age	-98.4383	24.4819	-146.422	-50.4547	16.1673	1	5.79858e-05
			Test order	68.0309	67.0114	-63.309	199.371	1.03066	1	0.310004
			Novel vs. Home	1249.96	267.773	725.13	1774.78	21.7899	1	3.042e-06
			Manual vs. Automated assay	-681.259	209.286	-1091.45	-271.067	10.5961	1	0.00113327
			Novel vs. Home * Manual vs. Automated assay	-1134.49	273.612	-1670.76	-598.219	17.1921	1	3.37831e-05
			(Scale)	313784
	iv. Dependent Variable: Food intake		(Intercept)	1.48113	0.658457	0.190583	2.77169	5.05981	1	0.0244869
			Body weight	-0.0544734	0.0360291	-0.125089	0.0161424	2.28592	1	0.130553
			Age	0.0388011	0.013255	0.0128219	0.0647803	8.56903	1	0.0034193
			Test order	0.00818141	0.124588	-0.236006	0.252368	0.00431228	1	0.947642
			Novel vs. Home	-0.386651	0.156604	-0.69359	-0.0797134	6.09584	1	0.01355
			Manual vs. Automated assay	0.148718	0.213654	-0.270036	0.567471	0.484511	1	0.486386
			Novel vs. Home * Manual vs. Automated assay	0.24241	0.19145	-0.132824	0.617645	1.60322	1	0.205448
			(Scale)	0.173524

## Sheet: 1C. SI length
	Length of social isolation		Test Novel vs. Home		B	Std. Error	95% Wald Confidence Interval		Hypothesis Test
							Lower	Upper	Wald Chi-Square	df	Sig.
	Females	i. Dependent Variable: Latency	0 Home	(Intercept)	-559.74	504.484	-1548.51	429.03	1.23106	1	0.267201
				Body weight	53.1296	36.3992	-18.2114	124.471	2.13055	1	0.144389
				Age	-8.6645	12.3087	-32.789	15.46	0.495524	1	0.481474
				Test order	-143.785	58.5551	-258.551	-29.0196	6.02977	1	0.0140666
				7wk vs.2wk social isolation	-138.893	96.7645	-328.548	50.7616	2.0603	1	0.15118
				(Scale)	106603
			1 Novel	(Intercept)	-1453.16	1164.68	-3735.9	829.578	1.55672	1	0.212146
				Body weight	147.85	84.3222	-17.4181	313.119	3.07441	1	0.0795337
				Age	-10.8419	29.2594	-68.1892	46.5053	0.137305	1	0.710975
				Test order	-149.516	245.692	-631.064	332.031	0.370335	1	0.542821
				7wk vs.2wk social isolation	-249.276	280.347	-798.747	300.195	0.79062	1	0.373913
				(Scale)	843410
		ii. Dependent Variable: Food intake	0 Home	(Intercept)	1.22645	0.649029	-0.0456188	2.49853	3.57088	1	0.0588013
				Body weight	-0.0274267	0.043388	-0.112466	0.0576122	0.399584	1	0.527304
				Age	0.0140234	0.0165177	-0.0183507	0.0463976	0.720788	1	0.395885
				Test order	-0.597774	0.116723	-0.826546	-0.369001	26.2278	1	3.03426e-07
				7wk vs.2wk social isolation	0.203089	0.131273	-0.0542022	0.46038	2.39342	1	0.121847
				(Scale)	0.281109
			1 Novel	(Intercept)	2.44336	0.433094	1.59451	3.29221	31.828	1	1.68444e-08
				Body weight	-0.0871562	0.028903	-0.143805	-0.0305074	9.09307	1	0.00256579
				Age	-0.00023163	0.0110639	-0.0219166	0.0214533	0.000438297	1	0.983297
				Test order	-0.139921	0.116331	-0.367926	0.0880844	1.44668	1	0.229062
				7wk vs.2wk social isolation	-0.0115889	0.102613	-0.212707	0.189529	0.0127549	1	0.91008
				(Scale)	0.140536
		iii. Dependent Variable: Latency		(Intercept)	-1359.7	765.825	-2860.68	141.293	3.15228	1	0.075821
				Body weight	97.1592	53.1651	-7.04252	201.361	3.33975	1	0.0676248
				Age	-9.99032	18.7321	-46.7045	26.7239	0.284438	1	0.593807
				Test order	-138.098	135.308	-403.297	127.101	1.04167	1	0.307434
				7wk vs.2wk social isolation	-215.344	108.682	-428.356	-2.33165	3.92602	1	0.0475444
				Novel vs. Home	813.299	134.78	549.135	1077.46	36.4124	1	1.5968e-09
				7wk vs.2wk social isolation * Novel vs. Home	73.7284	199.612	-317.504	464.961	0.136425	1	0.711861
				(Scale)	466426
		iv. Dependent Variable: Food intake		(Intercept)	1.73676	0.451137	0.852544	2.62097	14.8204	1	0.000118248
				Body weight	-0.0502616	0.029907	-0.108878	0.00835497	2.82441	1	0.0928409
				Age	0.00550805	0.0112024	-0.0164483	0.0274644	0.241753	1	0.622943
				Test order	-0.373654	0.0916289	-0.553243	-0.194065	16.6293	1	4.54433e-05
				7wk vs.2wk social isolation	0.242304	0.131239	-0.0149194	0.499526	3.40876	1	0.0648511
				Novel vs. Home	-0.0103717	0.0868501	-0.180595	0.159851	0.0142613	1	0.904942
				7wk vs.2wk social isolation * Novel vs. Home	-0.323684	0.131111	-0.580657	-0.0667107	6.09485	1	0.0135577
				(Scale)	0.220596
	Males	v. Dependent Variable: Latency	0 Home	(Intercept)	162.42	227.649	-283.765	608.604	0.509032	1	0.475558
				Body weight	-17.9483	8.76729	-35.1318	-0.764716	4.19098	1	0.0406396
				Age	18.7244	14.0433	-8.79996	46.2487	1.77778	1	0.182422
				Test order	0a
				7wk vs.2wk social isolation	143.22	85.3882	-24.1376	310.578	2.81328	1	0.0934872
				(Scale)	4821.93
			1 Novel	(Intercept)	-1874.01	748.396	-3340.84	-407.18	6.27019	1	0.0122786
				Body weight	74.3263	32.7527	10.1322	138.52	5.14981	1	0.0232489
				Age	16.5007	38.144	-58.2601	91.2615	0.187135	1	0.665312
				Test order	0a
				7wk vs.2wk social isolation	500.187	134.865	235.856	764.518	13.7552	1	0.000208248
				(Scale)	101817
		vi. Dependent Variable: Food intake	0 Home	(Intercept)	3.25494	1.27229	0.761302	5.74858	6.54509	1	0.0105174
				Body weight	-0.0166944	0.0507211	-0.116106	0.0827171	0.108334	1	0.742049
				Age	-0.0603359	0.0543077	-0.166777	0.0461052	1.23432	1	0.266568
				Test order	0a
				7wk vs.2wk social isolation	-0.773914	0.289082	-1.34051	-0.207323	7.16708	1	0.00742535
				(Scale)	0.197499
			1 Novel	(Intercept)	3.55246	1.689	0.242078	6.86284	4.42383	1	0.0354404
				Body weight	-0.0608326	0.0533596	-0.165416	0.0437503	1.29971	1	0.254265
				Age	-0.0433562	0.0488412	-0.139083	0.0523709	0.788006	1	0.374704
				Test order	0a
				7wk vs.2wk social isolation	-0.575458	0.301183	-1.16577	0.0148505	3.65061	1	0.0560487
				(Scale)	0.113597
		vii. Dependent Variable: Latency		(Intercept)	-1162.23	501.367	-2144.89	-179.566	5.37367	1	0.0204429
				Body weight	34.6378	20.8922	-6.3102	75.5858	2.74873	1	0.097332
				Age	19.2534	23.4062	-26.6219	65.1287	0.67663	1	0.41075
				Test order	0a
				7wk vs.2wk social isolation	220.045	43.7483	134.3	305.79	25.2989	1	4.90997e-07
				Novel vs. Home	265.425	129.484	11.641	519.208	4.20196	1	0.0403774
				7wk vs.2wk social isolation * Novel vs. Home	153.875	121.536	-84.331	392.08	1.60297	1	0.205482
				(Scale)	55372.9
		viii. Dependent Variable: Food intake		(Intercept)	3.73801	1.46278	0.871012	6.60501	6.53014	1	0.0106062
				Body weight	-0.0415069	0.0473845	-0.134379	0.051365	0.767306	1	0.381052
				Age	-0.0526548	0.0465846	-0.143959	0.0386493	1.27759	1	0.258347
				Test order	0a
				7wk vs.2wk social isolation	-0.496837	0.100229	-0.693283	-0.300391	24.5719	1	7.15886e-07
				Novel vs. Home	-0.784785	0.280738	-1.33502	-0.234549	7.81447	1	0.00518296
				7wk vs.2wk social isolation * Novel vs. Home	0.201761	0.147921	-0.0881596	0.491682	1.86043	1	0.172576
				(Scale)	0.148166
	Sex effect	ix. Dependent Variable: Latency	0 Home	(Intercept)	644.685	444.097	-225.73	1515.1	2.10736	1	0.146592
				Body weight	25.1837	28.4823	-30.6405	81.0079	0.781792	1	0.376594
				Age	-38.8881	15.9651	-70.1792	-7.597	5.93319	1	0.0148584
				Test order	0a
				Sex	-529.733	168.525	-860.037	-199.43	9.88063	1	0.00167028
				7wk vs.2wk social isolation	-475.149	153.957	-776.898	-173.399	9.52492	1	0.002027
				Sex * 7wk vs.2wk social isolation	376.129	120.965	139.043	613.216	9.66843	1	0.00187461
				(Scale)	78563.9
			1 Novel	(Intercept)	1591.73	1251.61	-861.39	4044.84	1.61732	1	0.203466
				Body weight	106.087	62.4243	-16.2618	228.437	2.88816	1	0.0892327
				Age	-118.129	36.1715	-189.024	-47.2338	10.6654	1	0.00109158
				Test order	0a
				Sex	-1841	397.956	-2620.98	-1061.02	21.4013	1	3.72522e-06
				7wk vs.2wk social isolation	-1626.18	356.125	-2324.18	-928.19	20.8513	1	4.9635e-06
				Sex * 7wk vs.2wk social isolation	1409.78	320.077	782.446	2037.12	19.3998	1	1.06017e-05
				(Scale)	507469
		x. Dependent Variable: Food intake	0 Home	(Intercept)	1.15511	0.775785	-0.365401	2.67562	2.21699	1	0.136499
				Body weight	-0.0532689	0.0431292	-0.137801	0.0312628	1.52547	1	0.216793
				Age	0.0567885	0.017805	0.0218912	0.0916857	10.1727	1	0.00142539
				Test order	0a
				Sex	0.918032	0.241316	0.445061	1.391	14.4725	1	0.000142223
				7wk vs.2wk social isolation	0.404719	0.171196	0.0691817	0.740256	5.58884	1	0.0180753
				Sex * 7wk vs.2wk social isolation	-0.570424	0.228388	-1.01806	-0.122791	6.23803	1	0.0125035
				(Scale)	0.210385
			1 Novel	(Intercept)	1.85857	0.661641	0.561781	3.15536	7.89068	1	0.00496901
				Body weight	-0.0765016	0.0363287	-0.147705	-0.00529854	4.43445	1	0.0352205
				Age	0.0189775	0.0143629	-0.00917336	0.0471283	1.74578	1	0.186408
				Test order	0a
				Sex	0.965449	0.227519	0.519519	1.41138	18.0062	1	2.20189e-05
				7wk vs.2wk social isolation	0.185925	0.12569	-0.0604225	0.432273	2.18814	1	0.139077
				Sex * 7wk vs.2wk social isolation	-0.43196	0.211289	-0.846079	-0.0178413	4.17959	1	0.0409136
				(Scale)	0.100547
		xi. Dependent Variable: Latency		(Intercept)	405.093	752.293	-1069.37	1879.56	0.289958	1	0.590247
				Body weight	72.5817	40.9959	-7.76887	152.932	3.13453	1	0.0766504
				Age	-82.0397	22.1716	-125.495	-38.5841	13.6916	1	0.000215419
				Test order	0a
				Novel vs. Home	1238.32	266.881	715.247	1761.4	21.5295	1	3.4843e-06
				Sex	-703.152	198.873	-1092.94	-313.367	12.501	1	0.000406732
				7wk vs.2wk social isolation	-600.342	181.832	-956.727	-243.957	10.9007	1	0.000961262
				Novel vs. Home * Sex	-1007.27	267.411	-1531.39	-483.159	14.1885	1	0.000165374
				Novel vs. Home * 7wk vs.2wk social isolation	-890.203	273.091	-1425.45	-354.955	10.6258	1	0.00111518
				Sex * 7wk vs.2wk social isolation	354.063	159.458	41.5312	666.596	4.93025	1	0.0263905
				Novel vs. Home * Sex * 7wk vs.2wk social isolation	1051.01	301.221	460.63	1641.39	12.1743	1	0.000484515
				(Scale)	305100
		xii. Dependent Variable: Food intake		(Intercept)	1.61448	0.59449	0.449303	2.77966	7.37527	1	0.0066127
				Body weight	-0.059354	0.0315427	-0.121176	0.00246853	3.54081	1	0.0598762
				Age	0.036762	0.0121828	0.0128841	0.0606399	9.1055	1	0.00254842
				Test order	0a
				Novel vs. Home	-0.390154	0.155801	-0.695518	-0.0847899	6.27094	1	0.0122734
				Sex	0.969321	0.214475	0.548958	1.38968	20.4259	1	6.19839e-06
				7wk vs.2wk social isolation	0.317237	0.156388	0.0107214	0.623753	4.1149	1	0.0425072
				Novel vs. Home * Sex	-0.111859	0.182836	-0.47021	0.246493	0.374297	1	0.540671
				Novel vs. Home * 7wk vs.2wk social isolation	-0.0733057	0.185478	-0.436836	0.290224	0.156204	1	0.692676
				Sex * 7wk vs.2wk social isolation	-0.614878	0.231698	-1.069	-0.160759	7.04262	1	0.00795923
				Novel vs. Home * Sex * 7wk vs.2wk social isolation	0.271806	0.234632	-0.188065	0.731676	1.34197	1	0.246687
				(Scale)	0.157847
	Estrous cyclicity	xiii. Dependent Variable: Latency	0 Home	(Intercept)	-571.284	423.142	-1400.63	258.059	1.82277	1	0.176984
				Body weight	62.66	31.5875	0.749614	124.57	3.93505	1	0.0472898
				Age	-10.0157	10.5338	-30.6617	10.6302	0.904044	1	0.3417
				Test order	-106.678	51.6638	-207.937	-5.41916	4.26363	1	0.0389365
				Estrus vs. Diestrus	-197.784	96.3539	-386.634	-8.93378	4.21351	1	0.0401034
				Proestrus vs. Diestrus	-318.667	107.255	-528.882	-108.451	8.82756	1	0.00296715
				Proestrus vs. Estrus	-120.883	70.5919	-259.24	17.4746	2.93238	1	0.0868193
				7wk vs.2wk social isolation	-203.084	187.342	-570.268	164.1	1.17512	1	0.278352
				Estrus vs. Diestrus * 7wk vs.2wk social isolation	49.7124	180.321	-303.709	403.134	0.0760046	1	0.782787
				Proestrus vs. Diestrus * 7wk vs.2wk social isolation	87.8074	188.954	-282.536	458.151	0.215948	1	0.642145
				Proestrus vs. Estrus * 7wk vs.2wk social isolation	38.095	99.0184	-155.978	232.168	0.148014	1	0.70044
				(Scale)	95560.7
		xiv. Dependent Variable: Food intake	1 Novel	(Intercept)	-2717.18	1330.64	-5325.18	-109.178	4.16982	1	0.0411502
				Body weight	217.35	96.5328	28.1491	406.551	5.06955	1	0.0243497
				Age	-13.6464	33.4004	-79.1099	51.8171	0.166929	1	0.682855
				Test order	-179.983	190.161	-552.691	192.725	0.895823	1	0.343904
				Estrus vs. Diestrus	-49.2564	311.875	-660.519	562.007	0.0249439	1	0.874507
				Proestrus vs. Diestrus	-321.795	348.311	-1004.47	360.883	0.853536	1	0.355554
				Proestrus vs. Estrus	-272.538	371.717	-1001.09	456.014	0.537563	1	0.463444
				7wk vs.2wk social isolation	-627.152	410.149	-1431.03	176.724	2.3381	1	0.126243
				Estrus vs. Diestrus * 7wk vs.2wk social isolation	387.225	475.474	-544.686	1319.14	0.663246	1	0.415416
				Proestrus vs. Diestrus * 7wk vs.2wk social isolation	-345.893	413.052	-1155.46	463.675	0.70125	1	0.402364
				Proestrus vs. Estrus * 7wk vs.2wk social isolation	-733.118	532.837	-1777.46	311.223	1.89304	1	0.16886
				(Scale)	853243

## Sheet: 1D. SI timing
	Age of social isolation	Test Novel vs. Home		B	Std. Error	95% Wald Confidence Interval		Hypothesis Test
						Lower	Upper	Wald Chi-Square	df	Sig.
	i. Dependent Variable: Latency	0 Home	(Intercept)	-119.521	374.86	-854.233	615.191	0.10166	1	0.749847
			Body weight	31.5977	27.585	-22.468	85.6634	1.31209	1	0.252016
			Age	-8.85076	11.1608	-30.7255	13.024	0.628884	1	0.427765
			Test order	-121.815	57.4632	-234.441	-9.18892	4.49386	1	0.0340167
			Adol. vs. Adult social isolation	-179.214	73.7072	-323.677	-34.7504	5.91185	1	0.0150394
			(Scale)	102935
		1 Novel	(Intercept)	-362.228	841.907	-2012.34	1287.88	0.185113	1	0.667016
			Body weight	103.796	59.2264	-12.2857	219.878	3.07135	1	0.0796831
			Age	-18.3951	28.6372	-74.523	37.7328	0.412612	1	0.520647
			Test order	-25.4432	258.772	-532.627	481.741	0.00966737	1	0.921676
			Adol. vs. Adult social isolation	-595.25	209.031	-1004.94	-185.557	8.1092	1	0.00440413
			(Scale)	770186
	ii. Dependent Variable: Food intake	0 Home	(Intercept)	0.712237	0.598569	-0.460936	1.88541	1.41586	1	0.234086
			Body weight	0.00244453	0.0403265	-0.076594	0.0814831	0.00367459	1	0.951663
			Age	0.0111787	0.0171512	-0.0224372	0.0447945	0.424804	1	0.51455
			Test order	-0.602577	0.112515	-0.823102	-0.382052	28.6818	1	8.5301e-08
			Adol. vs. Adult social isolation	0.136749	0.125234	-0.108706	0.382203	1.19234	1	0.274857
			(Scale)	0.285235
		1 Novel	(Intercept)	2.36871	0.385166	1.6138	3.12362	37.8205	1	7.75637e-10
			Body weight	-0.0876387	0.0251468	-0.136925	-0.0383519	12.1458	1	0.000491975
			Age	0.00245118	0.011219	-0.0195377	0.02444	0.0477354	1	0.827052
			Test order	-0.164955	0.122	-0.404072	0.0741612	1.82814	1	0.176347
			Adol. vs. Adult social isolation	0.101223	0.0869971	-0.0692886	0.271734	1.35377	1	0.24462
			(Scale)	0.138108
	iii. Dependent Variable: Latency		(Intercept)	-777.868	569.912	-1894.87	339.138	1.86293	1	0.172287
			Body weight	69.1586	39.7782	-8.80528	147.122	3.02275	1	0.0821043
			Age	-14.7626	18.0444	-50.1289	20.6038	0.669327	1	0.413286
			Test order	-65.0845	142.043	-343.483	213.314	0.209951	1	0.646806
			Adol. vs. Adult social isolation	-158.298	79.6728	-314.454	-2.14251	3.94759	1	0.0469384
			Novel vs. Home	1035.76	143.112	755.263	1316.25	52.3801	1	4.57301e-13
			Adol. vs. Adult social isolation * Novel vs. Home	-455.937	181.848	-812.353	-99.5207	6.28624	1	0.0121679
			(Scale)	425592
	iv. Dependent Variable: Food intake		(Intercept)	1.58477	0.39138	0.817678	2.35186	16.3959	1	5.13973e-05
			Body weight	-0.0394664	0.0257955	-0.0900245	0.0110918	2.34082	1	0.126023
			Age	0.00660372	0.0115732	-0.0160793	0.0292867	0.325592	1	0.568266
			Test order	-0.395163	0.089275	-0.570139	-0.220188	19.5927	1	9.5837e-06
			Adol. vs. Adult social isolation	0.066818	0.121237	-0.170802	0.304438	0.303751	1	0.58154
			Novel vs. Home	-0.183252	0.10749	-0.393929	0.0274247	2.90644	1	0.0882267
			Adol. vs. Adult social isolation * Novel vs. Home	0.106153	0.131816	-0.152202	0.364508	0.648523	1	0.420641
			(Scale)	0.224692

## Sheet: 1E. Time of day
	Time of day	Test Novel vs. Home		B	Std. Error	95% Wald Confidence Interval		Hypothesis Test
						Lower	Upper	Wald Chi-Square	df	Sig.
	i. Dependent Variable: Latency	0 Home	(Intercept)	330.891	159.225	18.8165	642.966	4.31866	1	0.0376965
			Body weight	8.95269	13.14	-16.8011	34.7065	0.464215	1	0.495661
			Age	-16.3949	12.3529	-40.6061	7.81624	1.7615	1	0.184437
			Test order	-192.912	62.23	-314.881	-70.9438	9.60993	1	0.00193528
			Night vs. Day	1.95982	70.0331	-135.303	139.222	0.000783112	1	0.977675
			(Scale)	105827
		1 Novel	(Intercept)	781.473	513.109	-224.202	1787.15	2.31958	1	0.127755
			Body weight	-2.37147	26.8286	-54.9545	50.2116	0.00781343	1	0.929564
			Age	7.4941	25.4828	-42.4512	57.4394	0.0864861	1	0.768693
			Test order	-471.547	171.896	-808.458	-134.637	7.52521	1	0.00608414
			Night vs. Day	125.027	175.794	-219.523	469.577	0.505821	1	0.476953
			(Scale)	789936
	ii. Dependent Variable: Food intake	0 Home	(Intercept)	0.892135	0.333578	0.238334	1.54594	7.15264	1	0.00748536
			Body weight	0.000860264	0.0175452		0.0352481	0.00240408	1	0.960894
			Age	0.0226623	0.012102	-0.00105723	0.0463819	3.50665	1	0.061123
			Test order	-0.0416974	0.120178	-0.277242	0.193847	0.120384	1	0.728619
			Night vs. Day	-0.602874	0.10665	-0.811904	-0.393844	31.9545	1	1.57826e-08
			(Scale)	0.270109
		1 Novel	(Intercept)	1.05869	0.23915	0.589962	1.52741	19.5973	1	9.5605e-06
			Body weight	-0.00808594	0.0139811	-0.0354885	0.0193166	0.334484	1	0.56303
			Age	0.0020995	0.0115885	-0.0206135	0.0248125	0.0328229	1	0.856233
			Test order	0.0403124	0.0828111	-0.121994	0.202619	0.236973	1	0.626401
			Night vs. Day	-0.276459	0.0838754	-0.440852	-0.112067	10.8641	1	0.00098047
			(Scale)	0.138948
	iii. Dependent Variable: Latency		(Intercept)	306.892	278.849	-239.642	853.426	1.21125	1	0.271084
			Novel vs. Home	522.268	121.861	283.425	761.111	18.3679	1	1.82104e-05
			Body weight	2.06067	17.2837	-31.8148	35.9361	0.0142149	1	0.905096
			Age	-3.55168	15.8758	-34.6676	27.5642	0.0500495	1	0.822977
			Test order	-332.524	103.907	-536.178	-128.869	10.2412	1	0.00137335
			Night vs. Day	32.9312	74.176	-112.451	178.314	0.1971	1	0.657072
			Novel vs. Home * Night vs. Day	62.9902	163.258	-256.989	382.969	0.148867	1	0.69962
			(Scale)	446472
	iv. Dependent Variable: Food intake		(Intercept)	1.09644	0.259632	0.587566	1.60531	17.834	1	2.41038e-05
			Novel vs. Home	-0.292187	0.0786082	-0.446256	-0.138117	13.8161	1	0.000201603
			Body weight	-0.00193687	0.0137074	-0.0288029	0.0249292	0.0199659	1	0.887632
			Age	0.0118569	0.00903685	-0.00585504	0.0295688	1.72149	1	0.189501
			Test order	0.000586407	0.0853332	-0.166664	0.167836	4.72239e-05	1	0.994517
			Night vs. Day	-0.606573	0.108601	-0.819426	-0.393719	31.1961	1	2.33229e-08
			Novel vs. Home * Night vs. Day	0.330639	0.104196	0.126419	0.53486	10.0694	1	0.00150748
			(Scale)	0.204381

## Sheet: 1F. Chow vs Chronic HFD
	Lean chow vs overweight HFD	Test Novel vs. Home		B	Std. Error	95% Wald Confidence Interval		Hypothesis Test
						Lower	Upper	Wald Chi-Square	df	Sig.
	i. Dependent Variable: Latency	0 Home	(Intercept)	810.941	447.11	-65.3785	1687.26	3.28965	1	0.0697179
			Body weight	-16.144	7.89367	-31.6153	-0.672697	4.18278	1	0.0408367
			Age	-12.5176	24.263	-60.0722	35.037	0.266167	1	0.605915
			Test order	-66.195	77.5536	-218.197	85.8072	0.728529	1	0.39336
			Chronic HFD vs. Chow	95.8124	115.578	-130.717	322.342	0.687214	1	0.407114
			(Scale)	92252.2
		1 Novel	(Intercept)	139.157	901.097	-1626.96	1905.27	0.0238487	1	0.877271
			Body weight	20.5307	20.0965	-18.8578	59.9191	1.04367	1	0.306969
			Age	28.0298	43.8227	-57.861	113.921	0.409113	1	0.52242
			Test order	-191.951	178.684	-542.164	158.262	1.15402	1	0.28271
			Chronic HFD vs. Chow	-562.929	312.205	-1174.84	48.9822	3.25107	1	0.0713767
			(Scale)	488499
	ii. Dependent Variable: Food intake	0 Home	(Intercept)	-0.424812	0.342354	-1.09581	0.246188	1.53973	1	0.214658
			Body weight	0.00628014	0.00881095	-0.010989	0.0235493	0.508035	1	0.475991
			Age	0.0522542	0.0159108	0.0210696	0.0834389	10.7859	1	0.00102276
			Test order	-0.181614	0.0575176	-0.294346	-0.0688813	9.97002	1	0.0015911
			Chronic HFD vs. Chow	-0.332285	0.150258	-0.626786	-0.0377851	4.89043	1	0.0270059
			(Scale)	0.0575728
		1 Novel	(Intercept)	0.0729691	0.804663	-1.50414	1.65008	0.00822338	1	0.927745
			Body weight	-0.00140999	0.0380653	-0.0760166	0.0731966	0.00137207	1	0.970452
			Age	0.0358014	0.0213464	-0.00603687	0.0776396	2.81286	1	0.0935113
			Test order	-0.0343065	0.228515	-0.482187	0.413574	0.0225385	1	0.880663
			Chronic HFD vs. Chow	0.582166	0.321436	-0.0478363	1.21217	3.28024	1	0.0701187
			(Scale)	0.736073
	iii. Dependent Variable: Latency		(Intercept)	175.075	506.857	-818.346	1168.5	0.11931	1	0.729784
			Body weight	1.02589	11.4864	-21.487	23.5388	0.00797687	1	0.928833
			Age	5.96009	26.662	-46.2965	58.2167	0.0499711	1	0.823114
			Test order	-130.926	100.541	-327.983	66.1317	1.69574	1	0.192845
			Novel vs. Home	700.839	128.306	449.365	952.313	29.8364	1	4.70093e-08
			Chronic HFD vs. Chow	-93.1102	157.09	-401.001	214.781	0.351315	1	0.55337
			Novel vs. Home * Chronic HFD vs. Chow	-240.931	187.667	-608.752	126.89	1.64819	1	0.199205
			(Scale)	290176
	iv. Dependent Variable: Food intake		(Intercept)	-0.253773	0.379827	-0.998221	0.490675	0.446395	1	0.504052
			Body weight	0.00276839	0.0174061	-0.031347	0.0368838	0.0252959	1	0.873632
			Age	0.0444515	0.0140496	0.0169149	0.0719881	10.0103	1	0.00155667
			Test order	-0.107507	0.119506	-0.341733	0.12672	0.809275	1	0.368335
			Novel vs. Home	0.129262	0.0694489	-0.00685542	0.265379	3.46426	1	0.0627086
			Chronic HFD vs. Chow	-0.283318	0.152582	-0.582373	0.0157366	3.44781	1	0.0633356
			Novel vs. Home * Chronic HFD vs. Chow	0.80646	0.234736	0.346386	1.26653	11.8034	1	0.000591227
			(Scale)	0.388028

## Sheet: 1G. Acute HFD
	Acute HFD		Test Novel vs. Home		B	Std. Error	95% Wald Confidence Interval		Hypothesis Test
							Lower	Upper	Wald Chi-Square	df	Sig.
	Acute HFD vs chow	i. Dependent Variable: Latency	0 Home	(Intercept)	958.839	559.53	-137.819	2055.5	2.9366	1	0.0865928
				Body weight	-17.2345	22.6634	-61.654	27.185	0.57829	1	0.446984
				Age	-23.0519	25.6997	-73.4224	27.3185	0.804562	1	0.369733
				Test order	-125.39	65.9948	-254.737	3.95783	3.60997	1	0.0574342
				Sex	125.142	175.269	-218.379	468.663	0.509797	1	0.475227
				Acute HFD vs Chow	-192.517	108.428	-405.032	19.9992	3.15246	1	0.0758125
				Sex * Acute HFD vs Chow	61.7991	110.402	-154.585	278.183	0.313336	1	0.57564
				(Scale)	62575
			1 Novel	(Intercept)	-167.334	1248.98	-2615.28	2280.61	0.0179498	1	0.893421
				Body weight	30.4772	62.7465	-92.5037	153.458	0.235924	1	0.627166
				Age	42.6778	46.8354	-49.1178	134.473	0.830341	1	0.362174
				Test order	-205.227	158.152	-515.199	104.745	1.68392	1	0.194404
				Sex	-265.188	440.733	-1129.01	598.633	0.36204	1	0.547375
				Acute HFD vs Chow	-1017.41	292.247	-1590.21	-444.62	12.1198	1	0.000498895
				Sex * Acute HFD vs Chow	225.452	270.393	-304.508	755.412	0.695212	1	0.404397
				(Scale)	309094
		ii. Dependent Variable: Food intake	0 Home	(Intercept)	0.969371	0.764871	-0.52975	2.46849	1.60621	1	0.205025
				Body weight	-0.0306379	0.0236462	-0.0769837	0.0157078	1.67879	1	0.195086
				Age	0.0171152	0.0253282	-0.0325272	0.0667575	0.456618	1	0.499209
				Test order	-0.319677	0.232028	-0.774444	0.13509	1.89819	1	0.168281
				Acute HFD vs Chow	5.10277	0.255719	4.60157	5.60397	398.187	1	0
				(Scale)	0.686061
			1 Novel	(Intercept)	4.97663	1.55947	1.92012	8.03313	10.184	1	0.00141668
				Body weight	-0.139186	0.0500915	-0.237363	-0.0410084	7.72081	1	0.00545879
				Age	-0.0685638	0.0456086	-0.157955	0.0208274	2.25994	1	0.132759
				Test order	-1.01405	0.328613	-1.65812	-0.36998	9.52245	1	0.00202973
				Acute HFD vs Chow	4.27562	0.463994	3.36621	5.18504	84.9129	1	0
				(Scale)	1.87655
		iii. Dependent Variable: Latency		(Intercept)	50.4491	340.746	-617.4	718.298	0.0219203	1	0.882299
				Body weight	0.993441	19.4035	-37.0367	39.0236	0.00262134	1	0.959167
				Age	14.1168	29.6858	-44.0664	72.3	0.226138	1	0.634402
				Test order	-135.282	88.9595	-309.639	39.0757	2.31256	1	0.128332
				Novel vs. Home	700.878	127.462	451.058	950.698	30.2361	1	3.82523e-08
				Acute HFD vs Chow	-183.915	85.6277	-351.742	-16.0875	4.61322	1	0.0317264
				Novel vs. Home * Acute HFD vs Chow	-684.104	128.129	-935.233	-432.976	28.5068	1	9.33693e-08
				(Scale)	182590
		iv. Dependent Variable: Food intake		(Intercept)	2.88091	1.01115	0.89909	4.86273	8.11759	1	0.00438378
				Body weight	-0.0830561	0.0319575	-0.145692	-0.0204206	6.75457	1	0.00935076
				Age	-0.0245089	0.0296365	-0.0825953	0.0335775	0.683903	1	0.408246
				Test order	-0.686528	0.192419	-1.06366	-0.309393	12.7297	1	0.000359893
				Novel vs. Home	0.0994929	0.0714045	-0.0404573	0.239443	1.94148	1	0.163508
				Acute HFD vs Chow	5.26536	0.286082	4.70465	5.82607	338.747	1	0
				Novel vs. Home * Acute HFD vs Chow	-1.13599	0.389579	-1.89955	-0.372427	8.50268	1	0.00354624
				(Scale)	1.32151
	Sex effect	v. Dependent Variable: Latency	0 Home	(Intercept)	958.839	559.53	-137.819	2055.5	2.9366	1	0.0865928
				Body weight	-17.2345	22.6634	-61.654	27.185	0.57829	1	0.446984
				Age	-23.0519	25.6997	-73.4224	27.3185	0.804562	1	0.369733
				Test order	-125.39	65.9948	-254.737	3.95783	3.60997	1	0.0574342
				Sex	125.142	175.269	-218.379	468.663	0.509797	1	0.475227
				Acute HFD vs Chow	-192.517	108.428	-405.032	19.9992	3.15246	1	0.0758125
				Sex * Acute HFD vs Chow	61.7991	110.402	-154.585	278.183	0.313336	1	0.57564
				(Scale)	62575
			1 Novel	(Intercept)	-167.334	1248.98	-2615.28	2280.61	0.0179498	1	0.893421
				Body weight	30.4772	62.7465	-92.5037	153.458	0.235924	1	0.627166
				Age	42.6778	46.8354	-49.1178	134.473	0.830341	1	0.362174
				Test order	-205.227	158.152	-515.199	104.745	1.68392	1	0.194404
				Sex	-265.188	440.733	-1129.01	598.633	0.36204	1	0.547375
				Acute HFD vs Chow	-1017.41	292.247	-1590.21	-444.62	12.1198	1	0.000498895
				Sex * Acute HFD vs Chow	225.452	270.393	-304.508	755.412	0.695212	1	0.404397
				(Scale)	309094
		vi. Dependent Variable: Food intake	0 Home	(Intercept)	0.207454	1.18253	-2.11025	2.52516	0.0307768	1	0.860739
				Body weight	-0.0377516	0.072884	-0.180602	0.105098	0.268291	1	0.60448
				Age	0.0597025	0.0231821	0.0142665	0.105139	6.63256	1	0.0100131
				Test order	-0.142178	0.221424	-0.576162	0.291806	0.412299	1	0.520805
				Sex	0.393475	0.417444	-0.424699	1.21165	0.888462	1	0.345894
				Acute HFD vs chow	5.60784	0.37946	4.86411	6.35156	218.404	1	0
				Sex * Acute HFD vs chow	-1.12364	0.391349	-1.89067	-0.356609	8.24375	1	0.00408925
				(Scale)	0.636767
			1 Novel	(Intercept)	0.449062	2.0909	-3.64903	4.54716	0.0461259	1	0.829947
				Body weight	0.0157674	0.104183	-0.188428	0.219963	0.0229048	1	0.879705
				Age	0.00899212	0.0265238	-0.0429937	0.0609779	0.114935	1	0.734594
				Test order	-0.631097	0.270546	-1.16136	-0.100836	5.44139	1	0.019665
				Sex	-0.233948	0.552807	-1.31743	0.849533	0.179098	1	0.672149
				Acute HFD vs Chow	4.72642	0.715495	3.32408	6.12877	43.6367	1	3.95356e-11
				Sex * Acute HFD vs Chow	-1.94773	0.579035	-3.08262	-0.812844	11.3148	1	0.000768898
				(Scale)	1.6689
		vii. Dependent Variable: Latency		(Intercept)	222.925	648.152	-1047.43	1493.28	0.118295	1	0.730891
				Body weight	-3.91648	36.5375	-75.5286	67.6957	0.0114899	1	0.914638
				Age	8.93287	30.8626	-51.5568	69.4225	0.0837754	1	0.772245
				Test order	-161.994	93.759	-345.758	21.7707	2.98518	1	0.0840302
				Novel vs. Home	767.005	166.284	441.094	1092.92	21.2762	1	3.97636e-06
				Sex	49.2866	233.347	-408.066	506.639	0.044612	1	0.832719
				Acute HFD vs chow	-182.034	152.009	-479.966	115.897	1.43407	1	0.231101
				Novel vs. Home * Sex	-140.199	255.315	-640.607	360.21	0.301533	1	0.582923
				Novel vs. Home * Acute HFD vs Chow	-788.15	166.971	-1115.41	-460.894	22.2812	1	2.355e-06
				Sex * Acute HFD vs Chow	32.4676	139.196	-240.351	305.286	0.054406	1	0.815566
				Novel vs. Home * Sex * Acute HFD vs Chow	223.317	255.93	-278.296	724.929	0.761379	1	0.382897
				(Scale)	187429
		viii. Dependent Variable: Food intake		(Intercept)	0.197073	1.09481	-1.94871	2.34286	0.0324025	1	0.857147
				Body weight	-0.0101332	0.061062	-0.129813	0.109546	0.0275392	1	0.868197
				Age	0.0325402	0.0159517	0.00127545	0.063805	4.16128	1	0.0413582
				Test order	-0.380146	0.14808	-0.670378	-0.0899138	6.59031	1	0.0102535
				Novel vs. Home	0.279642	0.0922088	0.0989158	0.460368	9.19727	1	0.00242376
				Sex	0.227873	0.35306	-0.464111	0.919858	0.416572	1	0.518652
				Acute HFD vs chow	5.48755	0.408728	4.68645	6.28864	180.255	1	0
				Novel vs. Home * Sex	-0.320053	0.128981	-0.572851	-0.0672544	6.15731	1	0.013087
				Novel vs. Home * Acute HFD vs Chow	-0.625398	0.521748	-1.64801	0.39721	1.43678	1	0.230661
				Sex * Acute HFD vs Chow	-0.921418	0.413543	-1.73195	-0.11089	4.96447	1	0.0258732
				Novel vs. Home * Sex * Acute HFD vs Chow	-1.23237	0.683236	-2.57149	0.106751	3.25341	1	0.0712751
				(Scale)	1.1335
	Acute vs chronic HFD	ix. Dependent Variable: Latency	0 Home	(Intercept)	-485.566	315.524	-1103.98	132.851	2.36826	1	0.123825
				Body weight	-12.6668	6.66242	-25.7249	0.391276	3.6147	1	0.0572712
				Age	50.09	19.4126	12.042	88.138	6.65787	1	0.00987189
				Test order	15.8073	50.4707	-83.1135	114.728	0.0980924	1	0.754131
				Acute vs Chronic HFD	55.1955	77.0579	-95.8353	206.226	0.513065	1	0.473815
				(Scale)	29420.2
			1 Novel	(Intercept)	1265.08	1068.44	-829.021	3359.19	1.40197	1	0.236395
				Body weight	21.8484	14.1528	-5.89067	49.5874	2.38315	1	0.12265
				Age	-63.2301	60.9862	-182.761	56.3006	1.07494	1	0.299832
				Test order	20.6783	135.993	-245.864	287.221	0.0231203	1	0.879145
				Acute vs Chronic HFD	-803.626	303.218	-1397.92	-209.329	7.02421	1	0.0080415
				(Scale)	202139
		x. Dependent Variable: Food intake	0 Home	(Intercept)	6.54402	2.90375	0.852774	12.2353	5.07891	1	0.0242186
				Body weight	-0.0561422	0.0220323	-0.0993247	-0.0129597	6.49322	1	0.0108287
				Age	-0.226486	0.118051	-0.457862	0.00488956	3.68081	1	0.0550419
				Test order	-0.0780348	0.217256	-0.503849	0.347779	0.129013	1	0.719458
				Acute vs Chronic HFD	3.61078	0.661786	2.31371	4.90786	29.7692	1	4.86653e-08
				(Scale)	0.662594
			1 Novel	(Intercept)	16.3335	4.50722	7.49952	25.1675	13.1323	1	0.000290246
				Body weight	-0.118024	0.053967	-0.223798	-0.0122509	4.78284	1	0.0287447
				Age	-0.563211	0.185158	-0.926114	-0.200308	9.25245	1	0.0023518
				Test order	-0.804426	0.371471	-1.5325	-0.0763557	4.68945	1	0.0303484
				Acute vs Chronic HFD	-0.341886	0.921745	-2.14847	1.4647	0.137575	1	0.710703
				(Scale)	2.51702
		xi. Dependent Variable: Latency		(Intercept)	124.231	519.416	-893.807	1142.27	0.057204	1	0.810971
				Body weight	4.89691	8.78949	-12.3302	22.124	0.310397	1	0.577437
				Age	-5.15766	28.6407	-61.2925	50.9772	0.0324292	1	0.857089
				Test order	16.5235	68.3916	-117.521	150.568	0.0583713	1	0.809089
				Novel vs. Home	459.7	137.19	190.812	728.588	11.228	1	0.00080571
				Acute vs Chronic HFD	-151.802	152.425	-450.55	146.946	0.99184	1	0.319293
				Novel vs. Home * Acute vs Chronic HFD	-430.694	138.809	-702.754	-158.633	9.62724	1	0.00191712
				(Scale)	122032
		xii Dependent Variable: Food intake		(Intercept)	11.2183	3.086	5.16989	17.2668	13.215	1	0.000277725
				Body weight	-0.0898035	0.0312906	-0.151132	-0.0284751	8.23682	1	0.0041049
				Age	-0.403233	0.123516	-0.645319	-0.161147	10.6578	1	0.00109606
				Test order	-0.453083	0.200227	-0.845521	-0.0606456	5.12048	1	0.0236451
				Novel vs. Home	0.940693	0.228355	0.493125	1.38826	16.9697	1	3.79808e-05
				Acute vs Chronic HFD	2.57606	0.668253	1.26631	3.88581	14.8604	1	0.000115765
				Novel vs. Home * Acute vs Chronic HFD	-1.96019	0.444551	-2.83149	-1.08889	19.4426	1	1.03671e-05
				(Scale)	1.63183
	Sex effect	xiii. Dependent Variable: Latency	0 Home	(Intercept)	259.423	268.041	-265.928	784.775	0.936728	1	0.333121
				Body weight	0.312443	10.0762	-19.4366	20.0615	0.000961488	1	0.975263
				Age	25.6477	48.293	-69.0049	120.3	0.282051	1	0.59536
				Test order	-235.191	101.559	-434.242	-36.1403	5.36303	1	0.020568
				Acute vs Chronic HFD	-261.339	90.7094	-439.126	-83.5522	8.30052	1	0.00396338
				Sex * Acute vs Chronic HFD	238.394	88.5219	64.8947	411.894	7.25255	1	0.00708005
				(Scale)	28862.9
			1 Novel	(Intercept)	664.523	810.975	-924.959	2254.01	0.671437	1	0.412551
				Body weight	-8.62496	31.5857	-70.5319	53.282	0.0745645	1	0.784803
				Age	-12.2867	135.705	-278.264	253.691	0.00819742	1	0.927858
				Test order	442.758	368.129	-278.761	1164.28	1.44655	1	0.229082
				Acute vs Chronic HFD	-457.842	201.061	-851.915	-63.7687	5.18529	1	0.0227788
				Sex * Acute vs Chronic HFD	-320.55	285.778	-880.665	239.565	1.25815	1	0.262001
				(Scale)	199737
		xiv. Dependent Variable: Food intake	0 Home	(Intercept)	0.922094	0.71358	-0.476497	2.32069	1.6698	1	0.196285
				Body weight	-0.0195299	0.0283117	-0.0750198	0.03596	0.475847	1	0.49031
				Age	-0.0502767	0.212725	-0.467209	0.366656	0.0558596	1	0.813164
				Test order	0.0721285	0.224185	-0.367267	0.511524	0.103514	1	0.747653
				Acute vs Chronic HFD	5.29237	0.3325	4.64068	5.94405	253.347	1	0
				Sex * Acute vs Chronic HFD	-0.798657	0.38871	-1.56051	-0.0367993	4.22152	1	0.0399143
				(Scale)	0.667277
			1 Novel	(Intercept)	1.89456	1.93803	-1.9039	5.69302	0.955644	1	0.328287
				Body weight	-0.00859912	0.0774088	-0.160318	0.143119	0.0123404	1	0.911547
				Age	-0.686053	0.371234	-1.41366	0.0415525	3.41523	1	0.0645975
				Test order	-0.00935644	0.71671	-1.41408	1.39537	0.000170425	1	0.989584
				Acute vs Chronic HFD	3.94828	0.604568	2.76335	5.13321	42.6506	1	6.54458e-11
				Sex * Acute vs Chronic HFD	-2.01	0.775209	-3.52938	-0.490614	6.72284	1	0.0095186
				(Scale)	2.48414
		xv. Dependent Variable: Latency		(Intercept)	379.326	456.3	-515.006	1273.66	0.691073	1	0.4058
				Body weight	-4.19268	17.3801	-38.2571	29.8718	0.0581939	1	0.809374
				Age	7.36533	68.69	-127.265	141.995	0.0114973	1	0.91461
				Test order	166.195	189.194	-204.618	537.008	0.771651	1	0.379707
				Sex	-201.245	139.055	-473.788	71.2986	2.09447	1	0.147833
				Acute vs Chronic HFD	-275.057	103.908	-478.712	-71.4017	7.0073	1	0.00811782
				Novel vs. Home * Sex	610.602	245.701	129.037	1092.17	6.17594	1	0.0129499
				Novel vs. Home * Acute vs Chronic HFD	-164.849	191.818	-540.805	211.107	0.738576	1	0.390117
				Sex * Acute vs Chronic HFD	231.214	90.4299	53.9746	408.453	6.53738	1	0.0105631
				Novel vs. Home * Sex * Acute vs Chronic HFD	-549.945	246.46	-1033	-66.8926	4.97905	1	0.0256561
				(Scale)	112091
		xvi. Dependent Variable: Food intake		(Intercept)	0.923984	1.00548	-1.04673	2.8947	0.844459	1	0.358125
				Body weight	-0.0133265	0.0411578	-0.0939943	0.0673413	0.10484	1	0.746097
				Age	-0.359084	0.194478	-0.740254	0.0220863	3.40918	1	0.0648346
				Novel vs. Home	0.923533	0.310608	0.314752	1.53231	8.84055	1	0.0029461
				Sex	0.0125399	0.375346	-0.723124	0.748204	0.00111616	1	0.973348
				Acute vs Chronic HFD	5.27786	0.314266	4.6619	5.89381	282.045	1	0
				Novel vs. Home * Sex	0.0271102	0.451304	-0.857429	0.91165	0.00360849	1	0.952099
				Novel vs. Home * Acute vs Chronic HFD	-1.26752	0.601643	-2.44672	-0.0883258	4.43849	1	0.0351374
				Sex * Acute vs Chronic HFD	-0.636259	0.459346	-1.53656	0.264042	1.91862	1	0.166009
				Novel vs. Home * Sex * Acute vs Chronic HFD	-1.58095	0.824488	-3.19691	0.0350191	3.67677	1	0.0551757
				(Scale)	1.56767

## Sheet: 1H. Sex
	Sex		Test Novel vs. Home		B	Std. Error	95% Wald Confidence Interval		Hypothesis Test
							Lower	Upper	Wald Chi-Square	df	Sig.
	Chow	i. Dependent Variable: Latency	0 Home	(Intercept)	382.392	448.235	-496.133	1260.92	0.72779	1	0.3936
				Body weight	42.3248	30.3962	-17.2508	101.9	1.93887	1	0.163791
				Age	-49.1488	17.367	-83.1875	-15.1101	8.00897	1	0.00465463
				Test order	-265.152	80.4521	-422.836	-107.469	10.8622	1	0.000981494
				Sex	-389.373	185.879	-753.689	-25.0565	4.38804	1	0.036192
				(Scale)	118267
			1 Novel	(Intercept)	1536.7	1471.64	-1347.66	4421.07	1.09037	1	0.296389
				Body weight	67.7352	90.2708	-109.192	244.663	0.563033	1	0.453041
				Age	-85.2844	38.2065	-160.168	-10.4011	4.98271	1	0.0256019
				Test order	-586.11	228.405	-1033.78	-138.444	6.58485	1	0.0102851
				Sex	-1017.21	549.51	-2094.23	59.8083	3.42666	1	0.0641516
				(Scale)	788286
		ii. Dependent Variable: Food intake	0 Home	(Intercept)	0.144134	0.71671	-1.26059	1.54886	0.0404434	1	0.840616
				Body weight	-0.0202687	0.0441109	-0.106724	0.066187	0.211136	1	0.645879
				Age	0.0665762	0.0181017	0.0310975	0.102055	13.5269	1	0.000235167
				Test order	-0.640503	0.103555	-0.843466	-0.43754	38.2564	1	6.20324e-10
				Sex	0.423668	0.271879	-0.109206	0.956541	2.42828	1	0.119164
				(Scale)	0.252881
			1 Novel	(Intercept)	1.11445	0.793968	-0.441695	2.6706	1.97024	1	0.160423
				Body weight	-0.0471945	0.0436683	-0.132783	0.0383938	1.16802	1	0.279809
				Age	0.0300405	0.0126524	0.00524223	0.0548387	5.63726	1	0.0175827
				Test order	-0.158771	0.121796	-0.397486	0.0799446	1.69932	1	0.192376
				Sex	0.38721	0.262065	-0.126427	0.900848	2.18311	1	0.139532
				(Scale)	0.15866
		iii. Dependent Variable: Latency		(Intercept)	417.252	807.844	-1166.09	2000.6	0.266773	1	0.605505
				Body weight	57.9912	52.7401	-45.3776	161.36	1.20904	1	0.271522
				Age	-68.5108	24.7998	-117.118	-19.904	7.63168	1	0.00573517
				Test order	-425.638	130.871	-682.14	-169.136	10.5778	1	0.00114453
				Sex	-460.239	289.78	-1028.2	107.719	2.52249	1	0.112233
				Novel vs. Home	1006.29	166.254	680.436	1332.14	36.6354	1	1.42422e-09
				Novel vs. Home * Sex	-516.292	206.17	-920.379	-112.206	6.27103	1	0.0122728
				(Scale)	446994
		iv. Dependent Variable: Food intake		(Intercept)	0.473515	0.666774	-0.833339	1.78037	0.504324	1	0.477606
				Body weight	-0.0228012	0.038182	-0.0976365	0.0520341	0.356614	1	0.550393
				Age	0.0465992	0.0128493	0.0214149	0.0717834	13.1521	1	0.000287201
				Test order	-0.400632	0.091611	-0.580186	-0.221077	19.1247	1	1.22447e-05
				Sex	0.438299	0.255091	-0.0616694	0.938268	2.95224	1	0.0857585
				Novel vs. Home	-0.052275	0.10771	-0.263383	0.158833	0.235546	1	0.627442
				Novel vs. Home * Sex	-0.173294	0.13223	-0.43246	0.0858716	1.71755	1	0.190009
				(Scale)	0.219968
	Chronic HFD	v. Dependent Variable: Latency	0 Home	(Intercept)	732.112	471.176	-191.376	1655.6	2.41429	1	0.120233
				Body weight	-7.04761	13.1611	-32.8428	18.7476	0.286749	1	0.592312
				Age	-22.1441	25.6953	-72.5059	28.2178	0.742692	1	0.3888
				Test order	-72.2168	74.5133	-218.26	73.8265	0.939311	1	0.332455
				Sex	70.114	139.501	-203.303	343.531	0.252613	1	0.615242
				Chronic HFD vs. Chow	222.222	202.923	-175.5	619.944	1.19925	1	0.273471
				Sex * Chronic HFD vs. Chow	-296.75	172.513	-634.869	41.3693	2.95895	1	0.0854034
				(Scale)	90465.6
			1 Novel	(Intercept)	436.664	1003.01	-1529.19	2402.52	0.189535	1	0.663304
				Body weight	-3.0268	37.6593	-76.8377	70.7841	0.00645987	1	0.93594
				Age	43.9219	46.8808	-47.9627	135.807	0.877753	1	0.348818
				Test order	-183.383	174.619	-525.629	158.864	1.10289	1	0.293632
				Sex	-95.2697	327.288	-736.742	546.203	0.0847324	1	0.770984
				Chronic HFD vs. Chow	-746.848	437.567	-1604.46	110.769	2.91323	1	0.0878559
				Sex * Chronic HFD vs. Chow	576.15	381.848	-172.258	1324.56	2.27662	1	0.131338
				(Scale)	487563
		vi. Dependent Variable: Food intake	0 Home	(Intercept)	-0.131141	0.358843	-0.83446	0.572177	0.133559	1	0.71477
				Body weight	-0.0145214	0.0158715	-0.0456289	0.0165861	0.837115	1	0.360223
				Age	0.0541534	0.0150551	0.0246461	0.0836608	12.9386	1	0.000321875
				Test order	-0.180542	0.0547432	-0.287837	-0.0732477	10.8767	1	0.000973806
				Sex	0.261212	0.113725	0.0383148	0.48411	5.27562	1	0.0216261
				Chronic HFD vs. Chow	-0.14199	0.15027	-0.436513	0.152533	0.892833	1	0.344711
				Sex * Chronic HFD vs. Chow	-0.124308	0.11765	-0.354897	0.106281	1.11639	1	0.290697
				(Scale)	0.0545993
			1 Novel	(Intercept)	-0.145759	1.35103	-2.79374	2.50222	0.0116397	1	0.914085
				Body weight	0.0118611	0.0723533	-0.129949	0.153671	0.0268739	1	0.869784
				Age	0.0375293	0.0184829	0.00130346	0.0737551	4.12288	1	0.0423071
				Test order	-0.0328404	0.229169	-0.482004	0.416323	0.0205354	1	0.886052
				Sex	-0.188487	0.381994	-0.937182	0.560207	0.243473	1	0.621709
				Chronic HFD vs. Chow	0.421615	0.53791	-0.632669	1.4759	0.614346	1	0.433156
				Sex * Chronic HFD vs. Chow	0.12164	0.45197	-0.764205	1.00749	0.0724328	1	0.787827
				(Scale)	0.761739
		vii. Dependent Variable: Latency		(Intercept)	249.081	557.026	-842.67	1340.83	0.199954	1	0.654758
				Body weight	-7.54475	21.6484	-49.9748	34.8853	0.121462	1	0.727455
				Age	10.847	29.9823	-47.9172	69.6112	0.130885	1	0.717517
				Test order	-128.193	100.892	-325.938	69.5509	1.61443	1	0.20387
				Novel vs. Home	766.778	166.481	440.481	1093.08	21.2133	1	4.10894e-06
				Sex	71.1204	169.663	-261.412	403.653	0.175718	1	0.675079
				Chronic HFD vs. Chow	52.6502	231.038	-400.177	505.477	0.0519317	1	0.819735
				Novel vs. Home * Sex	-142.27	256.77	-645.529	360.99	0.306999	1	0.579528
				Novel vs. Home * Chronic HFD vs. Chow	-600.428	251.967	-1094.27	-106.582	5.67851	1	0.0171739
				Sex * Chronic HFD vs. Chow	-230.103	181.173	-585.196	124.989	1.6131	1	0.204057
				Novel vs. Home * Sex * Chronic HFD vs. Chow	752.922	356.47	54.2544	1451.59	4.46123	1	0.0346724
				(Scale)	287218
		viii. Dependent Variable: Food intake		(Intercept)	-0.272144	0.628671	-1.50432	0.960027	0.187392	1	0.665096
				Body weight	-0.000785152	0.0358884	-0.071125	0.0695547	0.00047863	1	0.982546
				Age	0.0447628	0.0133544	0.0185887	0.0709368	11.2354	1	0.00080253
				Test order	-0.107588	0.12063	-0.344019	0.128842	0.795466	1	0.372452
				Novel vs. Home	0.280226	0.0921405	0.0996339	0.460818	9.24945	1	0.00235566
				Sex	0.186888	0.21814	-0.240658	0.614433	0.733994	1	0.391592
				Chronic HFD vs. Chow	-0.177976	0.209921	-0.589413	0.233461	0.718806	1	0.396536
				Novel vs. Home * Sex	-0.314499	0.12835	-0.566062	-0.0629373	6.00407	1	0.0142729
				Novel vs. Home * Chronic HFD vs. Chow	0.642725	0.324385	0.00694107	1.27851	3.92579	1	0.0475507
				Sex * Chronic HFD vs. Chow	-0.171608	0.167833	-0.500554	0.157338	1.04549	1	0.306548
				Novel vs. Home * Sex * Chronic HFD vs. Chow	0.34142	0.46396	-0.567925	1.25077	0.541522	1	0.461802
				(Scale)	0.399115

## Sheet: 1I. Estrous cycle
	Estrous cyclicity		Test Novel vs. Home		B	Std. Error	95% Wald Confidence Interval		Hypothesis Test
							Lower	Upper	Wald Chi-Square	df	Sig.
	Chow	i. Dependent Variable: Latency	0 Home	(Intercept)	-499.055	387.124	-1257.8	259.694	1.66187	1	0.197351
				Body weight	62.9389	30.5347	3.0921	122.786	4.24867	1	0.0392812
				Age	-15.9076	11.8337	-39.1012	7.28601	1.80704	1	0.178863
				Test order	-129.288	54.9891	-237.064	-21.511	5.5279	1	0.0187155
				Estrus vs. Diestrus	-215.5	93.0631	-397.901	-33.1	5.36217	1	0.0205781
				Proestrus vs. Diestrus	-327.987	103.301	-530.454	-125.52	10.081	1	0.00149809
				Proestrus vs. Estrus	-112.487	58.4253	-226.998	2.02466	3.70682	1	0.0541906
				(Scale)	97445.4
			1 Novel	(Intercept)	-2479.33	1125.69	-4685.64	-273.021	4.85101	1	0.02763
				Body weight	215.68	87.506	44.1714	387.189	6.07497	1	0.0137111
				Age	-28.4005	35.4574	-97.8958	41.0948	0.64156	1	0.423146
				Test order	-356.942	199.372	-747.705	33.8204	3.20528	1	0.0734009
				Estrus vs. Diestrus	43.0254	262.762	-471.978	558.029	0.0268117	1	0.869934
				Proestrus vs. Diestrus	-268.537	309.172	-874.504	337.43	0.754406	1	0.385085
				Proestrus vs. Estrus	-311.562	323.603	-945.813	322.689	0.926964	1	0.335653
				(Scale)	876963
		ii. Dependent Variable: Food intake	0 Home	(Intercept)	1.96865	0.593235	0.805929	3.13137	11.0124	1	0.000905035
				Body weight	-0.0866365	0.0364168	-0.158012	-0.0152609	5.65977	1	0.0173584
				Age	0.0284475	0.0156804	-0.00228555	0.0591806	3.29134	1	0.069646
				Test order	-0.181925	0.142796	-0.4618	0.0979511	1.62311	1	0.202658
				Estrus vs. Diestrus	0.156537	0.159053	-0.155201	0.468274	0.968611	1	0.325027
				Proestrus vs. Diestrus	0.283888	0.152908	-0.0158064	0.583583	3.44693	1	0.0633692
				Proestrus vs. Estrus	0.127352	0.175373	-0.216373	0.471077	0.527334	1	0.46773
				(Scale)	0.29299
			1 Novel	(Intercept)	2.58759	0.366899	1.86848	3.3067	49.7392	1	1.75604e-12
				Body weight	-0.107549	0.0240531	-0.154693	-0.0604062	19.9928	1	7.77342e-06
				Age	0.010783	0.0103293	-0.00946201	0.0310281	1.08979	1	0.296519
				Test order	-0.00314871	0.0863095	-0.172312	0.166015	0.00133091	1	0.970898
				Estrus vs. Diestrus	-0.00923142	0.0839407	-0.173752	0.155289	0.0120946	1	0.912429
				Proestrus vs. Diestrus	-0.0239565	0.112571	-0.244592	0.196679	0.0452889	1	0.831474
				Proestrus vs. Estrus	-0.0147251	0.109039	-0.228438	0.198988	0.0182367	1	0.892578
				(Scale)	0.0939188
	HFD	iii. Dependent Variable: Latency	0 Home	(Intercept)	-412.216	397.232	-1190.78	366.345	1.07686	1	0.2994
				Body weight	-10.1429	27.8626	-64.7526	44.4669	0.132519	1	0.715834
				Age	39.435	17.7724	4.60172	74.2684	4.92347	1	0.0264943
				Test order	33.6936	72.5298	-108.462	175.849	0.215805	1	0.642255
				Estrus vs. Diestrus	84.6903	70.353	-53.1991	222.58	1.44911	1	0.228671
				Proestrus vs. Diestrus	185.6	104.107	-18.4467	389.646	3.17829	1	0.074623
				Proestrus vs. Estrus	100.909	111.978	-118.564	320.382	0.812075	1	0.367507
				(Scale)	51125.9
			1 Novel	(Intercept)	-716.606	615.218	-1922.41	489.198	1.35676	1	0.244099
				Body weight	-39.3272	28.434	-95.0569	16.4025	1.91297	1	0.166633
				Age	95.2454	23.4428	49.2985	141.192	16.5071	1	4.84685e-05
				Test order	-164.666	142.437	-443.837	114.504	1.33649	1	0.247654
				Estrus vs. Diestrus	135.871	95.2989	-50.9116	322.653	2.03271	1	0.153945
				Proestrus vs. Diestrus	645.09	179.093	294.074	996.107	12.9743	1	0.000315803
				Proestrus vs. Estrus	509.22	177.377	161.567	856.872	8.24169	1	0.0040939
				(Scale)	120086
		iv. Dependent Variable: Food intake	0 Home	(Intercept)	17.118	1.28846	14.5927	19.6434	176.509	1	0
				Body weight	-0.0380568	0.0559083	-0.147635	0.0715215	0.463352	1	0.496061
				Age	-0.741506	0.0453765	-0.830442	-0.652569	267.034	1	0
				Test order	-0.172821	0.333069	-0.825625	0.479982	0.269232	1	0.603847
				Estrus vs. Diestrus	-0.502629	0.376503	-1.24056	0.235303	1.78221	1	0.181878
				Proestrus vs. Diestrus	0.201515	0.462438	-0.704848	1.10788	0.189892	1	0.663007
				Proestrus vs. Estrus	0.704144	0.438451	-0.155205	1.56349	2.57917	1	0.108278
				(Scale)	0.87492
			1 Novel	(Intercept)	13.7777	2.99199	7.9135	19.6419	21.2047	1	4.12753e-06
				Body weight	0.0487296	0.142031	-0.229646	0.327105	0.117712	1	0.731529
				Age	-0.607495	0.0899587	-0.783811	-0.431179	45.6035	1	1.4478e-11
				Test order	-0.742631	0.542654	-1.80621	0.320951	1.87284	1	0.17115
				Estrus vs. Diestrus	-1.77408	0.784013	-3.31072	-0.237445	5.12036	1	0.0236467
				Proestrus vs. Diestrus	-0.453039	0.726308	-1.87658	0.970498	0.389071	1	0.532788
				Proestrus vs. Estrus	1.32104	0.745959	-0.141008	2.7831	3.13621	1	0.0765716
				(Scale)	3.31316
